# Supplementary material for: Genetic Diversity and Population Structure Analyses in Bitter Gourd (Momordica charantia L.) Based on Agro-Morphological and Microsatellite Markers
Source: MDPI journal article supplement (doi:10.3390/plants12193512), 2023-10-09
Supplement: s1 [file s1]

Supplementary Material

**Table S1.** List of 96 bitter gourd (*Momordica charantia* L.) genotypes, sources and salient features.

| No. | Accessions name  | Salient features                                                                                | Taxon/Species | Sources            |
|-----|------------------|-------------------------------------------------------------------------------------------------|---------------|--------------------|
| 1   | DBG-33           | Green, extra-long fruits with discontinuous ridges, medium vine                                 | A             | West Bengal, India |
| 2   | Sel-31           | Dark green, medium long fruits with continuous ridges                                           | A             | Philippines        |
| 3   | IC-44419         | Light green, medium long fruits with discontinuous ridges and spiny surface                     | A             | NBPGR, New Delhi   |
| 4   | Sel-2            | Dark green, extra-long fruits with continuous sharp ridges, large long vine                     | A             | IARI, New Delhi    |
| 5   | HABG-22          | Creamy white, medium fruits with continuous ridges                                              | A             | IARI, New Delhi    |
| 6   | NDBT-7           | Dark green, medium long fruits with discontinuous ridges                                        | A             | Faizabad, India    |
| 7   | DBG-4            | White, long fruits with continuous ridges, medium vine                                          | A             | IARI, New Delhi    |
| 8   | Sel-30-1         | Light green, extra-long fruits with discontinuous ridges                                        | A             | Philippines        |
| 9   | Pusa Rasdar      | Dark green, capsicum shaped, medium with continuous smooth ridges, medium vine                  | A             | IARI, New Delhi    |
| 10  | IC-469512        | Dark green, medium long fruits with discontinuous ridges and spiny surface                      | A             | NBPGR, New Delhi   |
| 11  | IC-444212        | Green, medium long fruits with discontinuous ridges and spiny surface                           | A             | NBPGR, New Delhi   |
| 12  | IC-44423         | Creamy white, long fruits with discontinuous ridges and prominent tubercles                     | A             | NBPGR, New Delhi   |
| 13  | G-53             | Green, medium long fruits with discontinuous ridges                                             | A             | IARI, New Delhi    |
| 14  | Phule Green Gold | Dark green, medium long fruits with discontinuous ridges and spiny surface                      | A             | Maharashtra, India |
| 15  | IC-44419         | Light green, medium long fruits with discontinuous ridges                                       | A             | NBPGR, New Delhi   |
| 16  | CO-1             | Green, medium long fruits with discontinuous ridges and spiny surface                           | A             | TNAU, Coimbatore   |
| 17  | IC-85643         | Green, medium long fruits with discontinuous ridges and spiny surface                           | A             | NBPGR, New Delhi   |
| 18  | DBG-100-1        | Green, small fruits with discontinuous ridges and spiny surface                                 | B             | IARI, New Delhi    |
| 19  | IC-85649         | Green, small fruits with discontinuous ridges and spiny surface                                 | B             | NBPGR, New Delhi   |
| 20  | IC-505638        | Green, long fruits with discontinuous ridges and prominent tubercles                            | A             | NBPGR, New Delhi   |
| 21  | NEH-3            | Green, medium long fruits with discontinuous ridges                                             | A             | Manipur, India     |
| 22  | IC-68295         | Light green, long fruits with discontinuous ridges and prominent tubercles                      | A             | NBPGR, New Delhi   |
| 23  | IC-85647         | Dark green, small fruits with continuous ridges and smooth surface                              | B             | NBPGR, New Delhi   |
| 24  | Sel-1            | Light green, long fruits with continuous ridges, medium vine                                    | A             | IARI, New Delhi    |
| 25  | Pusa Vishesh     | Glossy green, long fruits with continuous ridges, medium vine                                   | A             | IARI, New Delhi    |
| 26  | G-16-2           | Dark green, medium long fruits with discontinuous ridges, spiny surface and prominent tubercles | A             | IARI, New Delhi    |
| 27  | DBGS-54-18       | Light green, medium long fruits with discontinuous narrow ridges, white flowers                 | A             | IARI, New Delhi    |
| 28  | DBG-100          | Dark green, extra small fruits with discontinuous ridges and spiny surface                      | B             | IARI, New Delhi    |

|    |           |                                                                                                 |   |                    |
|----|-----------|-------------------------------------------------------------------------------------------------|---|--------------------|
| 29 | DBG-46    | Dark green, medium long fruits with discontinuous ridges, spiny surface and prominent tubercles | A | West Bengal, India |
| 30 | Sel-30    | Glossy green, small fruits with continuous ridges and smooth surface                            | A | China              |
| 31 | DBG-100-0 | Dark green, extra small fruits with prominent tubercles and spiny surface                       | B | IARI, New Delhi    |
| 32 | Sel-54-1  | Dark Green, medium long fruits with continuous ridges and smooth surface                        | A | Taiwan             |
| 33 | Sel-38    | Green, medium long fruits with discontinuous ridges, medium vine                                | A | Lao                |
| 34 | G-16-1    | Green, long fruits with discontinuous ridges and spiny surface prominent tubercles              | A | IARI, New Delhi    |
| 35 | IC85634   | Green, medium fruits with continuous ridges                                                     | A | NBPGR, New Delhi   |
| 36 | S-32      | Green, medium long fruits with continuous ridges                                                | A | Philippines        |
| 37 | G-16      | Dark green, medium long fruits with discontinuous ridges, spiny surface and prominent tubercles | A | IARI, New Delhi    |
| 38 | IC-68275  | Green, small fruits with discontinuous ridges, spiny surface and prominent tubercles            | B | NBPGR, New Delhi   |
| 39 | G-55      | Dark green, medium long fruits with discontinuous ridges and smooth surface                     | A | IARI, New Delhi    |
| 40 | G-41-1    | Dark green, long fruits with discontinuous ridges, spiny surface and prominent tubercles        | A | IARI, New Delhi    |
| 41 | G-12      | Green, long fruits with discontinuous ridges, spiny surface and prominent tubercles             | A | IARI, New Delhi    |
| 42 | G-60      | Green, small fruits with discontinuous ridges and prominent tubercles                           | B | IARI, New Delhi    |
| 43 | NDBT-9    | Green, medium long fruits with discontinuous ridges, spiny surface and prominent tubercles      | A | Faizabad, India    |
| 44 | Sel-41    | Dark green, long fruits with discontinuous ridges, medium vine and prominent tubercles          | A | Bangladesh         |
| 45 | Sel-29    | Green, medium fruits with discontinuous ridges, pointed tubercles, medium vine                  | A | Philippines        |
| 46 | DBG-5     | Creamy white, long fruits with discontinuous ridges, prominent tubercles                        | A | IARI, New Delhi    |
| 47 | G-42      | Green, medium long fruits with discontinuous ridges and spiny surface                           | A | IARI, New Delhi    |
| 48 | G-70      | Green, medium long fruits with discontinuous ridges and spiny surface                           | A | IARI, New Delhi    |
| 49 | NEH-2     | Dark green, medium long fruits with continuous ridges, medium vine                              | A | Meghalaya, India   |
| 50 | IC-44418  | Light green, medium long fruits with discontinuous ridges and spiny surface                     | A | NBPGR, New Delhi   |
| 51 | Sel-2-1   | Dark green, extra-long fruits with continuous ridges and smooth surface                         | A | IARI, New Delhi    |
| 52 | G-7       | Green, medium long fruits with discontinuous ridges and spiny surface                           | A | IARI, New Delhi    |
| 53 | Sel-58    | Green, medium long fruits with discontinuous ridges and spiny surface                           | A | China              |
| 54 | NL-39     | Green, medium long fruits with discontinuous ridges, and prominent tubercles                    | A | Odisha, India      |
| 55 | DBG-38    | Dark green, medium long fruits with discontinuous ridges and prominent tubercles                | A | West Bengal, India |
| 56 | G-12-1    | Creamy white, medium long fruits with discontinuous ridges and spiny surface                    | A | IARI, New Delhi    |
| 57 | DBG-7     | Light green, medium long fruits with discontinuous ridges, and prominent tubercles              | A | IARI, New Delhi    |
| 58 | NEH-4     | Creamy white, medium long fruits with ridges and prominent tubercles                            | A | Manipur, India     |
| 59 | Sel-57    | Dark green, medium long fruits with smooth tubercles, and discontinuous ridges                  | A | China              |
| 60 | IC-68294  | Light green, medium long fruits with discontinuous ridges                                       | A | NBPGR, New Delhi   |
| 61 | Sel-13    | Green, medium long fruits with discontinuous ridges and prominent tubercles                     | A | Philippines        |

|    |                    |                                                                                                 |   |                       |
|----|--------------------|-------------------------------------------------------------------------------------------------|---|-----------------------|
| 62 | G-23               | Dark green, medium long fruits with discontinuous ridges, prominent tubercles                   | A | IARI, New Delhi       |
| 63 | G-73               | Green, medium long fruits with discontinuous ridges and spiny surface                           | A | IARI, New Delhi       |
| 64 | IC-39725           | Green, medium long fruits with discontinuous ridges, spiny surface and prominent tubercles      | A | NBPGR, New Delhi      |
| 65 | G-22               | Glossy green, medium long fruits with continuous ridges, and smooth surface                     | A | IARI, New Delhi       |
| 66 | IC-68314           | Green, extra-long fruits with discontinuous ridges, prominent tubercles and spiny surface       | A | NBPGR, New Delhi      |
| 67 | IC-85643           | Green, medium long fruits with discontinuous ridges and spiny surface                           | A | NBPGR, New Delhi      |
| 68 | IC-315350          | Green, long fruits with continuous ridges and smooth surface                                    | A | NBPGR, New Delhi      |
| 69 | G-35               | Dark green, medium long fruits with discontinuous ridges and smooth surface                     | A | IARI, New Delhi       |
| 70 | Sel-31-1           | Creamy white, medium long fruits with ridges, prominent tubercles and medium vine               | A | China                 |
| 71 | IC-44413           | Light green, medium long fruits with discontinuous ridges and spiny surface                     | A | NBPGR, New Delhi      |
| 72 | G-47               | Dark green, medium long fruits with discontinuous ridges and prominent tubercles                | A | IARI, New Delhi       |
| 73 | CBM-12             | Green, extra small fruits with discontinuous ridges, prominent tubercles and spiny surface      | B | USA                   |
| 74 | Kalyanpur Baramati | Dark green, long fruits with discontinuous ridges, prominent tubercles and smooth surface       | A | West Bengal, India    |
| 75 | Pusa Do Mausumi    | Fruits glossy, green with continuous ridges with smooth surface and vine vigorous long          | A | IARI, New Delhi       |
| 76 | G-71               | Dark green, long fruits with spiny surface, prominent tubercles                                 | A | IARI, New Delhi       |
| 77 | DBGS-21-06         | Dark green, long fruits with discontinuous ridges, predominantly gynoeious and prominent spines | A | IARI, New Delhi       |
| 78 | DBSG-48-00         | Green, long fruits with discontinuous ridges, predominantly gynoeious and prominent spines      | A | IARI, New Delhi       |
| 79 | Punjab-14          | Green, medium fruits with continuous ridges and smooth surface                                  | A | Punjab, India         |
| 80 | DBG-52             | Dark green, extra-long fruits with discontinuous ridges                                         | A | West Bengal, India    |
| 81 | Sel-30-2           | Light green, medium long fruits with discontinuous ridges                                       | A | Philippines           |
| 82 | IC-541249          | Dark green, medium long fruits with discontinuous ridges and spiny surface                      | A | NBPGR, New Delhi      |
| 83 | IC-469518          | Dark green, medium long fruits with discontinuous ridges and spiny surface                      | A | NBPGR, New Delhi      |
| 84 | G-5                | Dark green, long fruits with continuous ridges and smooth surface                               | A | IARI, New Delhi       |
| 85 | MC-84-1            | Green, medium long fruit with prominent spines                                                  | A | Kerala, India         |
| 86 | IC-47035           | Green, medium long fruits with discontinuous ridges and spiny surface                           | A | NBPGR, New Delhi      |
| 87 | Sel-53             | Light green, long fruits with continuous smooth ridges                                          | A | Taiwan                |
| 88 | Andhra Collection  | Light green, medium long fruits with discontinuous ridges                                       | A | Andhra Pradesh, India |
| 89 | DBG-33-1           | Green, medium long fruits with discontinuous ridges and prominent tubercles                     | A | West Bengal, India    |
| 90 | Nakhra Local       | Medium vine, long, dark green fruits with continuous ridges                                     | A | Odisha, India         |
| 91 | G-11               | Dark green, long fruits with discontinuous ridges and prominent tubercles                       | A | IARI, New Delhi       |
| 92 | IC-113875          | Green, medium long fruits with discontinuous ridges                                             | A | NBPGR, New Delhi      |
| 93 | G-43               | Green, medium long fruits with discontinuous ridges and spiny surface                           | A | IARI, New Delhi       |
| 94 | IC-505629          | Light green, medium long fruits with discontinuous ridges and prominent spines                  | A | NBPGR, New Delhi      |

|    |           |                                                                               |   |                  |
|----|-----------|-------------------------------------------------------------------------------|---|------------------|
| 95 | IC-858650 | Dark green, medium long fruits with discontinuous ridges and prominent spines | A | NBPGR, New Delhi |
| 96 | G-39      | Dark green, small fruits with discontinuous ridges and prominent tubercles    | B | IARI, New Delhi  |

A= *M. charantia* var. *charantia*; B= *M. charantia* var. *muricata*.

NBPGR, New Delhi: National Bureau of Plant Genetic Resources, New Delhi (Collected from different parts of the country by NBPGR, New Delhi).

IARI, New Delhi: Indian Agricultural Research Institute, New Delhi (Developed advance breeding lines).

**Table S2.** Forward and reverse primers of 33 SSR markers used in the study.

| Sr. No. | Markers     | Forward primer         | Reverse primer          | Tm (°C) | Allele size range (bp) |
|---------|-------------|------------------------|-------------------------|---------|------------------------|
| 1       | AVRDC_BG-83 | TATGCAGGGAAGACTGATGG   | TTTTGCTGGCTAAGGTGTTG    | 50.0    | 60-100                 |
| 2       | AVRDC_BG-66 | AGAGGTCTGCCTCTTCCAAA   | CAAGGAACGCAGAAATCCTA    | 50.0    | 100-140                |
| 3       | AVRDC_BG-74 | AACACCTTCTGACTCCACCC   | CGTTCAATCCTCTCCTCCTC    | 52.0    | 100-140                |
| 4       | AVRDC_BG-1  | CAAGGAACGCAGAAATCCTA   | GAGGTCTGCCTCTTCCAAAA    | 50.0    | 100-140                |
| 5       | AVRDC_BG-2  | GAGCACACAGAAAATTGGGT   | TGATCCACTCCCAATCTTAGC   | 51.0    | 100-140                |
| 6       | AVRDC_BG-95 | GTTCTCAATTGCATCCGCTA   | CAGCAACAGCAACAGCAGTA    | 50.0    | 190-260                |
| 7       | BGSSR-08    | TTAGCTCGCAGTCGCCAC     | ATTGGCCTCAGCAGCCAG      | 52.0    | 390-420                |
| 8       | CMBR-57     | GAAGCACAATCACTCGTTGC   | GAACGGGTGTTACCTGAGGA    | 55.0    | 120-140                |
| 9       | CMBR-22     | CACGGAACATCCGACCTAT    | TTTGGGGAATATGGGTTGA     | 52.0    | 100-140                |
| 10      | CMBR-30     | ACAGAGCGTAGGCTTGCTTT   | ATTGGAGGGCAAGTCTGGT     | 55.0    | 270-280                |
| 11      | CMBR-31     | TCTTTTTTCATTCCTCCCTTTG | GAAGTGCACGGAGTTGATGA    | 52.0    | 220-240                |
| 12      | JY-003      | GTGGGTGCAATGGGTGTC     | CTGCTGCTGTTGCTTCTTC     | 56.0    | 50-140                 |
| 13      | JY-004      | GTCAACTGCCATCGGTAC     | AGGGAAGAAGAAGAAGAAG     | 56.0    | 50-80                  |
| 14      | JY-005      | TTTATAGCAAACGGCTCA     | RGAACATATCGCAAACCTTA    | 56.0    | 260-270                |
| 15      | JY-008      | CTCGAACTTTCTGCTC       | TGAATTGAATTGCTCT        | 54.0    | 260-280                |
| 16      | JY-009      | TAAACAACAAAACCAC       | CTCAGAGTCAGAGCAA        | 52.0    | 250-270                |
| 17      | JY-011      | AAGTTGGGTTTACGAGTG     | TGGATGATGTAGGGTTTC      | 52.0    | 170-220                |
| 18      | McSSR-18    | TAAAGAATCGGCCAGTTTCGG  | GGGGTTAGAGAAAATGAGAGGC  | 58.0    | 80-90                  |
| 19      | McSSR-11    | TCGTTGTTTCTCCCTCTCTCG  | GCATAACACAGAATTGAGGGACC | 49.0    | 70-100                 |
| 20      | McSSR-22    | CCATGACCGATGTAGCACTCC  | TCGAACCAACCTAAACCAG     | 54.0    | 120-140                |
| 21      | McSSR-47    | TTGATTTTGAATCAGCGTTGT  | ATTTTGCACAAGGCCTACCA    | 51.0    | 180-200                |
| 22      | McSSR-54    | CCATCCATATCCCAATTCCA   | TCATCACAAACCTCCCTTTTTTC | 46.0    | 120-130                |
| 23      | N-1         | GTCTTCCAGGTTGGGAACAG   | ATCTGGTTCCTCGGGAGATT    | 58.0    | 110-140                |
| 24      | N-6         | GGGAATTCTCAAAGAGCCAGA  | TGGCACACTCTGCATGAAAT    | 58.0    | 80-130                 |
| 25      | N-9         | ATCCATCCCCACAAGTTGAA   | CCATAAGGATATGTTTGCATGG  | 56.0    | 40-70                  |
| 26      | S-9         | TTCCCATTACAGATCACTCC   | CCACCAAATTCAAGAACCCAC   | 58.0    | 270-290                |
| 27      | S-12        | GACATCCTTCTTGCTCTTACA  | GAAACGGAACGAAACCTCA     | 58.0    | 100-150                |
| 28      | S-13        | TTGGTTGTGGTGCTGAGTTC   | GATGTAGGGGTTGGGTTGAT    | 58.0    | 220-260                |
| 29      | S-20        | CCCCTTCTAATCACAACCAA   | GGCCTAATTTCTGCCCTTT     | 57.0    | 270-290                |
| 30      | S-24        | GCTCTGCGTTTCATTCTTCA   | TGAACCCTCAGACTCAAATC    | 56.0    | 250-290                |

|    |      |                      |                       |      |         |
|----|------|----------------------|-----------------------|------|---------|
| 31 | S-32 | CTAAATCACGCAAACCCATC | GAGCAAAAGACTGAGGAAAAC | 56.0 | 130-180 |
| 32 | S-33 | ATTAGTGGGGCGGGTAGT   | TGGATGAGCATGTTAGGGATC | 58.0 | 220-240 |
| 33 | S-26 | GAACGCCCTGTG CTTAGC  | TTTCGTCTTCCAATGAGCC   | 57.0 | 140-180 |

Tm: Annealing temperature.

**Table S3.** Pearson Correlation Matrix (Genotypic Correlations Matrix) among different quantitative traits in 96 bitter gourd genotypes.

|         | AFW (g) | DFFFO                | DFFH                 | DFMFO                | FD (cm)              | FL (cm)              | NNFFF                | NFFPP                | VL (cm)              | YPP (g)              |
|---------|---------|----------------------|----------------------|----------------------|----------------------|----------------------|----------------------|----------------------|----------------------|----------------------|
| AFW (g) | 1       | -0.124 <sup>NS</sup> | -0.122 <sup>NS</sup> | -0.110 <sup>NS</sup> | 0.520 <sup>**</sup>  | 0.754 <sup>**</sup>  | -0.127 <sup>NS</sup> | -0.348 <sup>**</sup> | 0.441 <sup>**</sup>  | 0.653 <sup>**</sup>  |
| DFFFO   |         | 1                    | 0.801 <sup>**</sup>  | 0.930 <sup>**</sup>  | -0.089 <sup>NS</sup> | 0.001 <sup>NS</sup>  | 0.706 <sup>**</sup>  | -0.490 <sup>**</sup> | -0.143 <sup>NS</sup> | -0.560 <sup>**</sup> |
| DFFH    |         |                      | 1                    | 0.816 <sup>**</sup>  | -0.031 <sup>NS</sup> | -0.019 <sup>NS</sup> | 0.614 <sup>**</sup>  | -0.475 <sup>**</sup> | -0.059 <sup>NS</sup> | -0.569 <sup>**</sup> |
| DFMFO   |         |                      |                      | 1                    | -0.121 <sup>NS</sup> | -0.036 <sup>NS</sup> | 0.553 <sup>**</sup>  | -0.413 <sup>**</sup> | -0.163 <sup>NS</sup> | -0.454 <sup>**</sup> |
| FD (cm) |         |                      |                      |                      | 1                    | 0.289 <sup>*</sup>   | -0.087 <sup>NS</sup> | -0.408 <sup>**</sup> | 0.085 <sup>NS</sup>  | 0.137 <sup>NS</sup>  |
| FL (cm) |         |                      |                      |                      |                      | 1                    | -0.054 <sup>NS</sup> | -0.223 <sup>*</sup>  | 0.611 <sup>**</sup>  | 0.591 <sup>**</sup>  |
| NFFF    |         |                      |                      |                      |                      |                      | 1                    | -0.371 <sup>NS</sup> | -0.172 <sup>NS</sup> | -0.488 <sup>**</sup> |
| NFPP    |         |                      |                      |                      |                      |                      |                      | 1                    | -0.029 <sup>NS</sup> | 0.363 <sup>**</sup>  |
| VL (cm) |         |                      |                      |                      |                      |                      |                      |                      | 1                    | 0.466 <sup>**</sup>  |
| YPP (g) |         |                      |                      |                      |                      |                      |                      |                      |                      | 1                    |

<sup>\*\*</sup> Significant at 1% level of probability. NNFFF: Node number of first female flower; DFFFO: Days to first female flower opening; DFMFO: Days to first male flower opening; DFFH: Days to first fruit harvest; FL: Fruit length (cm); FD: Fruit diameter (cm); AFW: Average fruit weight (g); NFPP: Number of fruits per plant (No.); YPP: Yield per plant(g); VL: vine length(cm).

**Table S4.** Estimates of direct and indirect effects of different quantitative traits on fruit yield per plant in bitter melon genotypes.

|                       | AFW (g)       | DFFFO                 | DFFH           | DFMFO        | FD (cm)              | FL (cm)      | NNFF           | NNFPP         | VL (cm)       |
|-----------------------|---------------|-----------------------|----------------|--------------|----------------------|--------------|----------------|---------------|---------------|
| AFW (g)               | <b>0.6604</b> | -0.0818               | -0.0807        | -0.0727      | 0.3431               | 0.4979       | -0.0841        | -0.2296       | 0.2913        |
| DFFFO                 | 0.0264        | <b>-0.2129</b>        | -0.216         | -0.198       | 0.0189               | -0.0001      | -0.1504        | 0.1042        | 0.0305        |
| DFFH                  | 0.0163        | -0.1353               | <b>-0.1333</b> | -0.1088      | 0.0041               | 0.0025       | -0.0818        | 0.0634        | 0.0079        |
| DFMFO                 | -0.0189       | 0.1599                | 0.1403         | <b>0.172</b> | -0.0209              | -0.0062      | 0.0951         | -0.071        | -0.0281       |
| FD (cm)               | -0.0402       | 0.0069                | 0.0024         | 0.0094       | <b>-0.0775</b>       | -0.0224      | 0.0068         | 0.0316        | -0.0066       |
| FL (cm)               | 0.141         | 0.0001                | -0.0035        | -0.0068      | 0.0541               | <b>0.187</b> | -0.0101        | -0.0417       | 0.1142        |
| NFF                   | 0.0096        | -0.0532               | -0.0463        | -0.0417      | 0.0066               | 0.0041       | <b>-0.0754</b> | 0.0279        | 0.013         |
| NFPP                  | -0.167        | -0.2351               | -0.2283        | -0.1983      | -0.196               | -0.1072      | -0.1781        | <b>0.4803</b> | -0.0137       |
| VL (cm)               | 0.0254        | -0.0083               | -0.0034        | -0.0094      | 0.0049               | 0.0352       | -0.0099        | -0.0016       | <b>0.0577</b> |
| Corelation on YPP (g) | 0.653**       | -0.5597 <sup>NS</sup> | -0.5688**      | -0.4543**    | 0.1373 <sup>NS</sup> | 0.5908**     | -0.4879**      | 0.3635**      | 0.4662**      |

Residual effect = 0.337: Diagonal bold figures represent the direct effect; \*\* Significant at 1% level of probability. NNFF: Node number of first female flower; DFFFO: Days to first female flower opening; DFMFO: Days to first male flower opening; DFFH: Days to first fruit harvest; FL: Fruit length (cm); FD: Fruit diameter (cm); AFW: Average fruit weight (g); NFPP: Number of fruits per plant (No.); YPP: Yield per plant(g); VL: vine length(cm).

**Table S5.** Corresponding Eigen vectors for different principal components (PCs) based on analysis of phenotypic traits.

|    |         | PC1      | PC2      | PC3      | PC4      | PC5      | PC6      | PC7      | PC8      | PC9      | PC10     |
|----|---------|----------|----------|----------|----------|----------|----------|----------|----------|----------|----------|
| 1  | NNFF    | 0.36259  | 0.10837  | 0.06827  | 0.07563  | -0.80898 | 0.38508  | 0.17616  | 0.0779   | -0.03326 | 0.07386  |
| 2  | DFFFO   | 0.44192  | 0.18951  | 0.16971  | 0.15954  | 0.19351  | 0.07439  | -0.08469 | -0.2383  | -0.30184 | -0.71867 |
| 3  | DFMFO   | 0.40745  | 0.15999  | 0.17619  | 0.29606  | 0.32214  | -0.13896 | 0.34468  | 0.62747  | 0.17887  | 0.14861  |
| 4  | DFFH    | 0.43164  | 0.19301  | 0.13939  | -0.02553 | 0.26498  | 0.15444  | -0.18789 | -0.51178 | 0.04885  | 0.60223  |
| 5  | FL (cm) | -0.16423 | 0.49827  | 0.23029  | 0.08136  | -0.13625 | -0.05583 | -0.73435 | 0.31755  | 0.05444  | 0.01876  |
| 6  | FD (cm) | -0.07347 | 0.30499  | -0.67784 | 0.05649  | 0.25118  | 0.58705  | -0.00966 | 0.16164  | -0.07032 | -0.00681 |
| 7  | AFW (g) | -0.19949 | 0.50777  | -0.10321 | 0.27041  | -0.11343 | -0.21262 | 0.29931  | -0.37455 | 0.55514  | -0.1499  |
| 8  | NNFPP   | -0.22857 | -0.36157 | 0.39731  | 0.38422  | 0.14409  | 0.57259  | -0.08759 | -0.03703 | 0.38038  | -0.09586 |
| 9  | YPP (g) | -0.4016  | 0.21184  | 0.23335  | 0.43681  | 0.01453  | 0.01593  | 0.27071  | -0.08996 | -0.64184 | 0.23405  |
| 10 | VL (cm) | -0.18766 | 0.33877  | 0.42497  | -0.67761 | 0.13642  | 0.28629  | 0.31271  | 0.06917  | 0.02568  | -0.08034 |



| Number | Eigenvalue | Percent |                                                                                   | Cum Percent | ChiSquare | DF     | Prob>ChiSq |
|--------|------------|---------|-----------------------------------------------------------------------------------|-------------|-----------|--------|------------|
| PC1    | 4.0533     | 40.533  |  | 40.533      | 757.622   | 44.383 | <.0001*    |
| PC2    | 2.6557     | 26.557  |  | 67.091      | 539.704   | 41.414 | <.0001*    |
| PC3    | 1.1673     | 11.673  |  | 78.763      | 318.569   | 36.115 | <.0001*    |
| PC4    | 0.5867     | 5.867   |  | 84.630      | 218.438   | 28.875 | <.0001*    |
| PC5    | 0.5375     | 5.375   |  | 90.005      | 185.113   | 21.795 | <.0001*    |
| PC6    | 0.4460     | 4.460   |  | 94.465      | 139.575   | 15.780 | <.0001*    |
| PC7    | 0.2503     | 2.503   |  | 96.968      | 79.771    | 10.495 | <.0001*    |
| PC8    | 0.1882     | 1.882   |  | 98.850      | 48.668    | 6.084  | <.0001*    |
| PC9    | 0.0705     | 0.705   |  | 99.555      | 4.547     | 2.956  | 0.2029     |
| PC10   | 0.0445     | 0.445   |  | 100.000     | .         | 0.067  | .          |
